# Supplementary material
Source: PubMed Central journal article supplement (PMC5873228)

**Supplemental Table 1.** Summarizes clinical features, treatment, and outcome of ATLL patients with CNS involvement at diagnosis, or after relapse (N=18).

| Patient code | Age at diagnosis (yrs) | Gender | ATLL Subtype | CNS Site at Diagnosis                                               | Initial Treatment                                                                                                                                                                                                                                                                                                                    | CNS relapse site                            | Subsequent Treatment and Outcome                                                                                                                                                                         |
|--------------|------------------------|--------|--------------|---------------------------------------------------------------------|--------------------------------------------------------------------------------------------------------------------------------------------------------------------------------------------------------------------------------------------------------------------------------------------------------------------------------------|---------------------------------------------|----------------------------------------------------------------------------------------------------------------------------------------------------------------------------------------------------------|
| ATLL2        | 37                     | Male   | Acute        | Not assessed initially                                              | AZT-IFN x 6.5 yr (CR), had PD with nodal and lung disease, then oral etoposide x 4 wks (PD), AZT-vorinostat x 1 yr (objective response) followed by followed by oral AZT only > 4 yr (SD), after PD in nodal disease, BM, and perineal mass, had pralatrexate x 3 courses (PD), mogamulizumab x 2 courses (PD in CNS after seizures) | Leptomeningeal                              | Received alternating high dose MTX-AZT x 3 cycles with IT chemotherapy and EPOCH x 2 cycles (PR and CSF clearance), then became debilitated. Died from PD: OS= 13.4 yr                                   |
| ATLL25       | 67                     | Male   | Acute        | Lymphomatous meningitis-presented with altered mentation            | AZT-IFN x 8 days (PD), IT chemo, HD-MTX-AZT x 2 cycles, kinetic failure (PD)                                                                                                                                                                                                                                                         |                                             | Died from PD: OS= 2.7 mo                                                                                                                                                                                 |
| ATLL27       | 51                     | Female | Acute        | Lymphomatous meningitis-presented with headaches and blurred vision | AZT-IFN with IT chemo x 1 (CR, then refused further IT chemo and AZT-IFN due to side effects), had PD after 2.8 yr, then VCAP-AP-VECP x 2 cycles (PR then PD), then oral etoposide (SD)                                                                                                                                              |                                             | Died likely due to PD at outside center, OS= 4 yr                                                                                                                                                        |
| ATLL33       | 36                     | Female | Lymphomatous | Not assessed initially                                              | EPOCH x 2 cycles (PR) followed by AZT-IFN x 2 weeks, progressed with mass extension into temporal lobe                                                                                                                                                                                                                               | Temporal lobe extension from zygomatic bone | Had IFRT followed by HD-MTX x 2 cycles (CR) and maintenance AZT-IFN; relapsed with soft tissue mass after 6.7 mo, had IFRT (CR); relapsed with severe refractory hypercalcemia. Died from PD: OS= 1.6 yr |

|         |    |        |              |                                                                                  |                                                                                                                                                                                                                                                                                |                |                                                                                                                                                                   |
|---------|----|--------|--------------|----------------------------------------------------------------------------------|--------------------------------------------------------------------------------------------------------------------------------------------------------------------------------------------------------------------------------------------------------------------------------|----------------|-------------------------------------------------------------------------------------------------------------------------------------------------------------------|
| ATLL46  | 43 | Male   | Lymphomatous | Lymphomatous meningitis-presented with blurred vision                            | HD-MTX x 2 cycles with IT chemotherapy                                                                                                                                                                                                                                         |                | Alive at las follow up, went back to country of origin; OS= 4.3 weeks                                                                                             |
| ATLL49  | 55 | Male   | Acute        | Lymphomatous meningitis-presented with cranial nerve deficits                    | HD-MTX x 1 cycle with IT chemotherapy while intubated                                                                                                                                                                                                                          |                | Died from infection (pneumonia, sepsis), multi-organ failure: OS= 11 days                                                                                         |
| ATLL53  | 58 | Female | Acute        | Lymphomatous meningitis-presented with altered mentation                         | IT chemotherapy with CSF clearance, then AZT-IFN (PD after 8 weeks); CHOP-ONTAK x 1 cycle                                                                                                                                                                                      |                | Lost follow after moving to another center. Died from PD: OS= 6 mo                                                                                                |
| ATLL80  | 43 | Male   | Acute        | Positive CSF at diagnosis, unknown symptoms                                      | IT chemotherapy, AZT-IFN started with normalization of lymphocyte count                                                                                                                                                                                                        |                | Deceased outpatient from illicit drug overdose. OS= 2.6 wks                                                                                                       |
| ATLL103 | 47 | Female | Acute        | Not assessed initially                                                           | AZT-IFN (PR, then PD after 4 weeks), followed by VCAP-AP-VECP x 7 cycles with IT chemotherapy prophylaxis (CR), followed by allogeneic SCT                                                                                                                                     | Leptomeningeal | Received HD-MTX-AZT x 3 cycles with IT chemotherapy x 10 until CSF clearance. Completed craniospinal radiation. Deceased with sepsis after PD in bones. OS= 25 mo |
| ATLL114 | 55 | Male   | Lymphomatous | Lymphomatous meningitis with right eye orbit involvement-presented with diplopia | CODOX/IVAC with alternating HD-MTX-AZT x 5 cycles with IT chemotherapy with CSF clearance                                                                                                                                                                                      |                | PD with severe refractory hypercalcemia, renal failure, debilitation. Deceased; OS= 5.8 mo                                                                        |
| ATLL115 | 77 | Male   | Lymphomatous | Negative CSF at diagnosis                                                        | EPOCH-bortezomib-raltegravir x 6 cycles (CR with PFS 28 mo); relapsed with nodal, and skin plaques, received brentuximab vedotin x 7 courses (CR, with PFS 28 months); progressed with nodal disease and skin disease, failed brentuximab, and progressed with CNS involvement | Leptomeningeal | Received HD-MTX (ongoing); OS= 5.6 yr                                                                                                                             |

|         |    |        |              |                                                                            |                                                                                                                                                                                   |                   |                                                                                                                                                                             |
|---------|----|--------|--------------|----------------------------------------------------------------------------|-----------------------------------------------------------------------------------------------------------------------------------------------------------------------------------|-------------------|-----------------------------------------------------------------------------------------------------------------------------------------------------------------------------|
| ATLL120 | 55 | Female | Lymphomatous | Negative CSF at diagnosis                                                  | DA-EPOCH x 3 cycles switched to CHOEP x 3 cycles with oral AZT and IT chemotherapy as prophylaxis (CR with PFS 13 mo). Relapsed with leukemia, nodal disease, and CNS involvement | Leptomeningeal    | Received alternating HD-MTX-Ara-C (x 2 cycles) and IVAC (x 1 cycle) with IT chemotherapy with CSF clearance, had PD, AZT-IFN (PD), then GVD (PD). Died after PD: OS= 1.6 yr |
| ATLL128 | 56 | Female | Lymphomatous | Pituitary gland mass and positive CSF-presented with headache and diplopia | Partial pituitary tumor resection, high dose ARA-C/MTX, with IT chemotherapy followed by radiation, then MTX-AZT x 1 (PR), then PD, DHAP x 1 cycle (PD).                          |                   | Deceased after PD (leukemia, persistent hypercalcemia); OS= 7.8 mo                                                                                                          |
| ATLL148 | 65 | Female | Acute        | Positive CSF at diagnosis, no known symptoms                               | Hyper cVAD x 1 course (PR)                                                                                                                                                        |                   | Was alive at last follow up, went back to country of origin; OS= 6 weeks                                                                                                    |
| ATLL156 | 38 | Female | Lymphomatous | Lymphomatous meningitis-presented with vision loss                         | Refused treatment                                                                                                                                                                 |                   | Hospice care, deceased: OS= 5.6 wks                                                                                                                                         |
| ATLL195 | 47 | Male   | Lymphomatous | Sino-nasal mass with CNS extension                                         | Refused treatment                                                                                                                                                                 |                   | Went to hospice care: OS= 2.1 wks                                                                                                                                           |
| ATLL206 | 62 | Female | Lymphomatous | Negative CSF at diagnosis                                                  | CHOP x 3 cycles with PR after cycle 2, refused further therapy, progressed with brain mass                                                                                        | Intracranial mass | Deceased: OS= 4.8 mo                                                                                                                                                        |
| ATLL222 | 56 | Male   | Acute        | Diffuse patchy meningeal enhancement on brain MRI, proven positive by CSF  | AZT-IFN x 17 days, IT chemotherapy (transient dramatic hematologic response, then PD)                                                                                             |                   | Went to Hospice. Died of PD; OS= 4.3 weeks                                                                                                                                  |

**Ara-C:** Cytarabine; **AZT-IFN:** Zidovudine/Interferon alpha; **CHOEP:** etoposide, cyclophosphamide, vincristine, doxorubicin and prednisone; **CNS:** cerebrospinal fluid; **CODOX/IVAC:** cyclophosphamide, vincristine and doxorubicin/ifosfamide, etoposide and cytarabine; **CR:** Complete response; **CSF:** Cerebrospinal fluid; **DA-EPOCH:** dose-adjusted etoposide, cyclophosphamide, vincristine, doxorubicin and prednisone; **HDMTX:** High-dose methotrexate; **HyperCVAD:** cyclophosphamide, vincristine, doxorubicin and dexamethasone, alternated with high-dose cytarabine and methotrexate; **IFRT:** involved field radiation therapy; **IT:** Intrathecal; **OS:** overall survival; **PFS:** progression free survival; **PD:** Progressive disease; **SD:** stable disease; **UA:** Unable to assess; **VCAP-AP-VECP-->** **VCAP:** vincristine, cyclophosphamide, doxorubicin and prednisone; **AP:** doxorubicin, prednisone; **VECP:** vincristine, etoposide, carboplatin, and prednisone.

**Supplemental Figure 1.** PFS according to first-line chemotherapy regimen

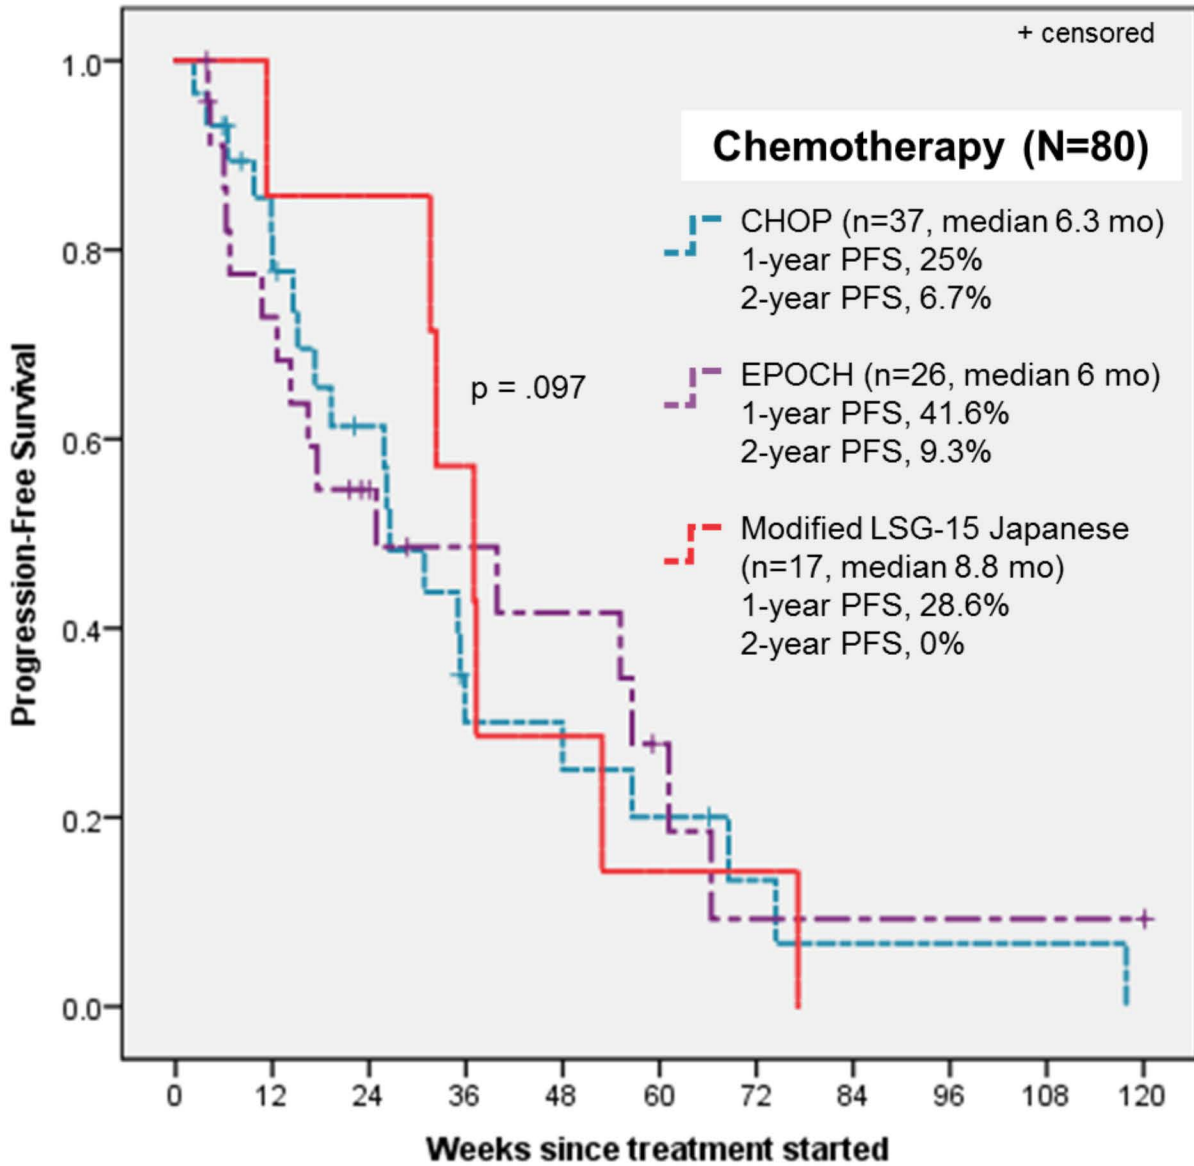

Supplement: ba011106-suppl1.pdf [file ba011106-suppl1.pdf]
